# Supplementary material
Source: PubMed Central journal article supplement (PMC7948461)
Supplement: mmc1.pdf [file mmc1.pdf]

## Supporting Information for

### SARS-CoV-2 viral budding and entry can be modeled using BSL-2 level virus-like particles

Caroline B. Plescia, Emily A. David, Dhableswar Patra, Ranjan Sengupta, Souad Amiar, Yuan Su, and Robert V. Stahelin\*

\*Corresponding Author: Robert V. Stahelin  
E-mail: rstaheli@purdue.edu

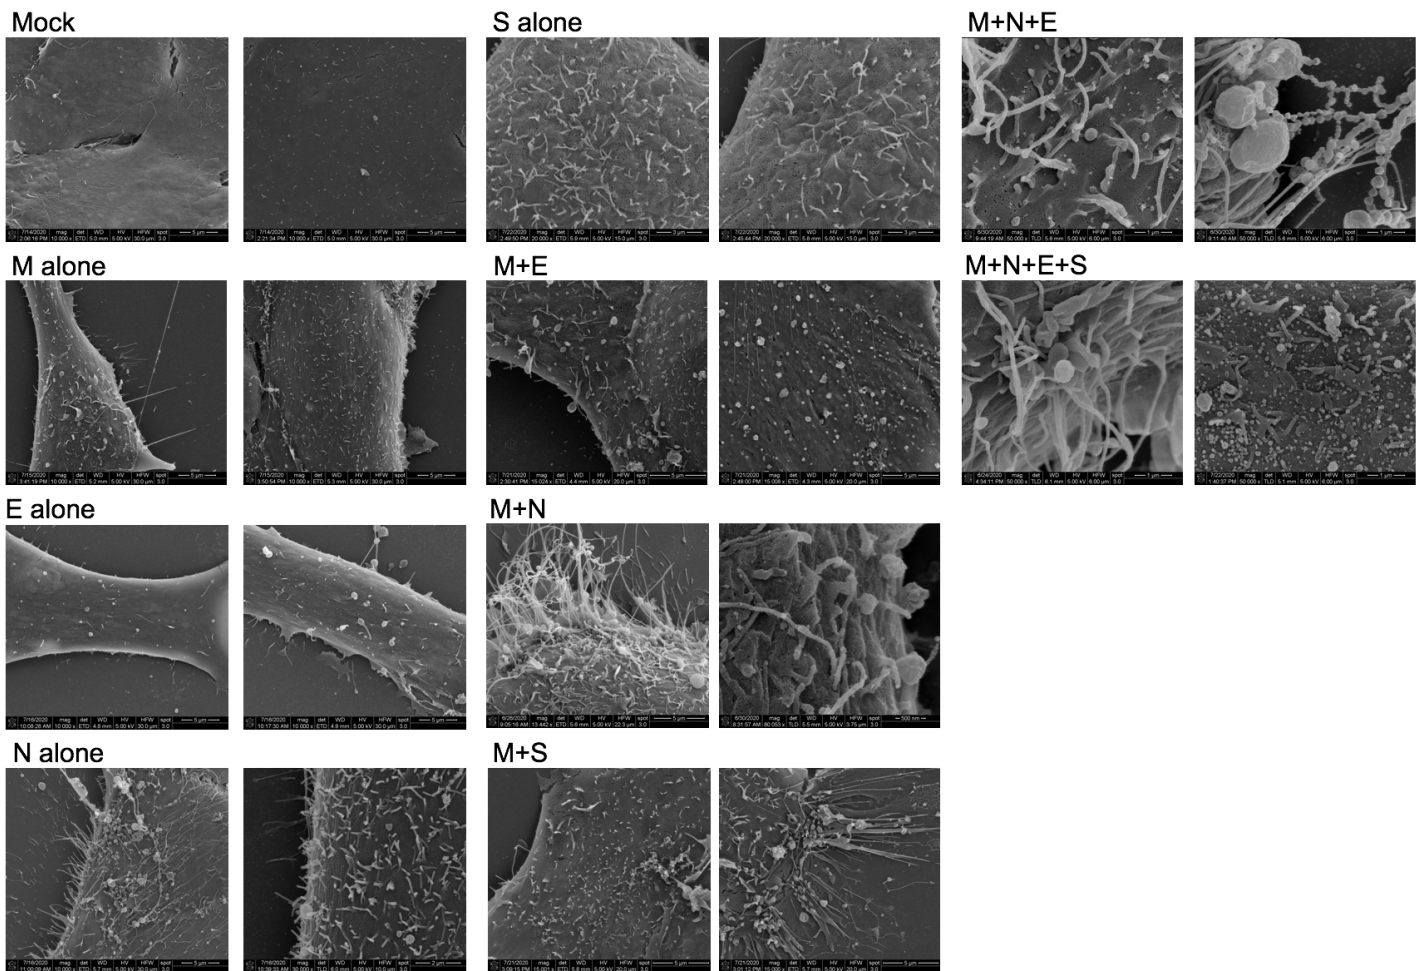

**Figure S1.** Scanning electron microscopy of SARS-CoV-2 viral structural protein expressing cells. HEK293 cells were seeded onto coverslips and transfected individually and in combination with M, N, E, and/or S. Cells were fixed with glutaraldehyde 72-hours post-transfection and kept at 4°C until fixed with osmium tetroxide. Samples were then gradually dehydrated with ethanol and completely dehydrated with a critical point dryer. Once dehydrated, samples were mounted onto aluminum pins with double-sided carbon tape, charged with silver paint, and sputter coated prior to imaging.

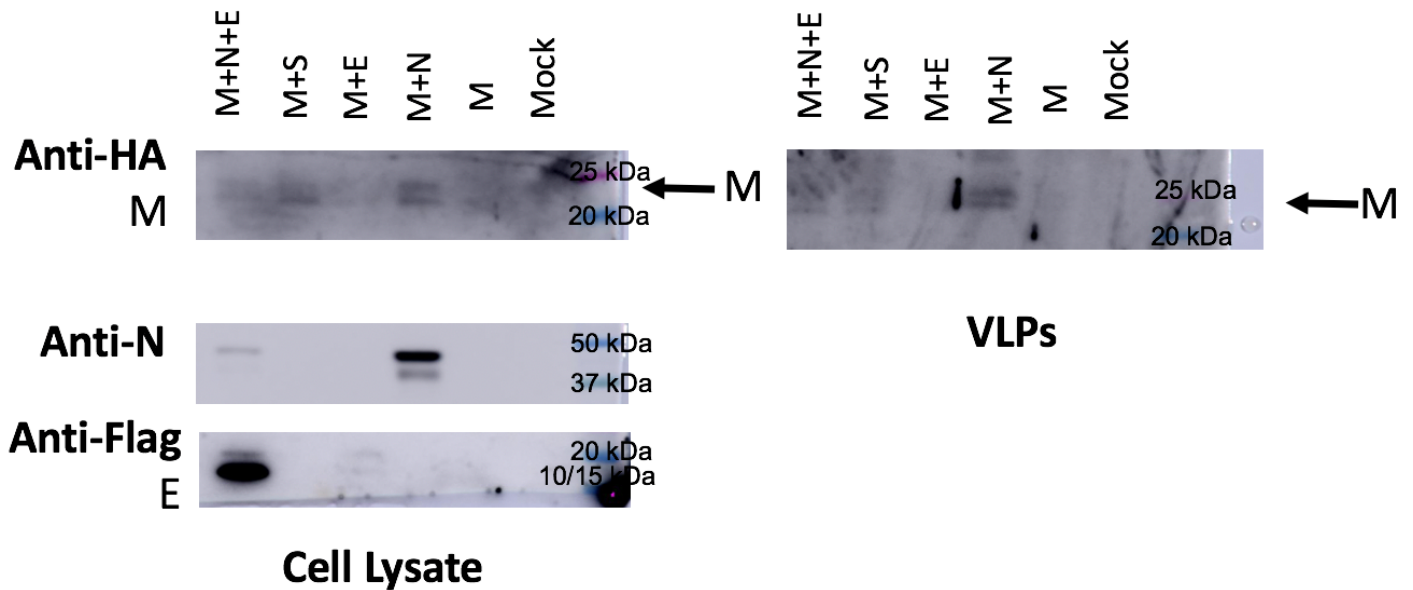

**Figure S2.** Western blot analysis of the cell lysate and VLP fractions of different combinations of M, N, E, and/or S. Total protein content of cell lysates were used to normalize loading conditions and was quantified using the Pierce bicinchoninic acid assay. VLP loading was calculated as a constant ratio to normalized cell lysates.

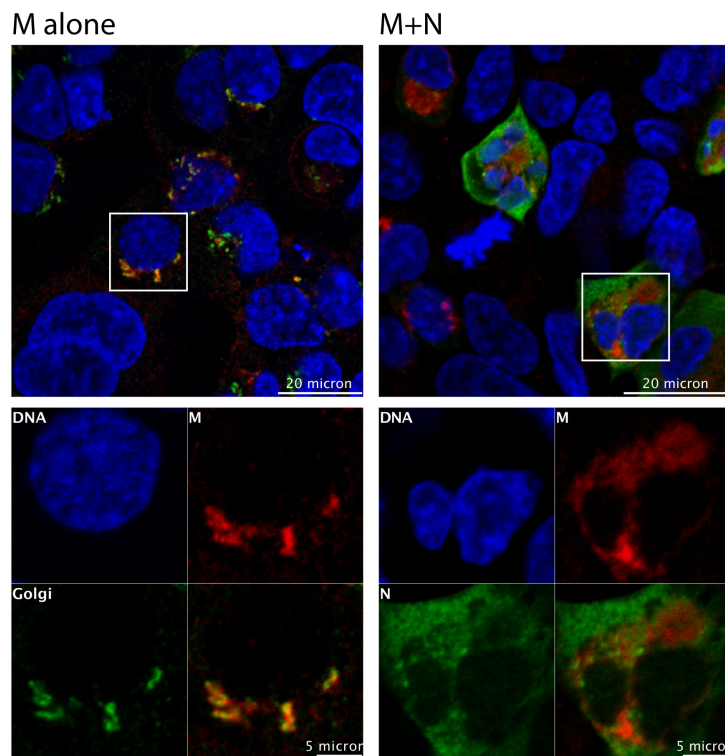

**Figure S3.** Cellular redistribution and accumulation of SARS-CoV-2 M protein in the presence of N protein. Immunofluorescence assays of HEK293 cells expressing M alone or M+N for 24 hours prior to fixation, indicated that M protein expressed alone accumulated at the Golgi apparatus (as indicated in the zoomed left inset). However, when co-expressed with N protein, M protein exhibited more diffuse and perinuclear distribution (as indicated in zoomed right inset).

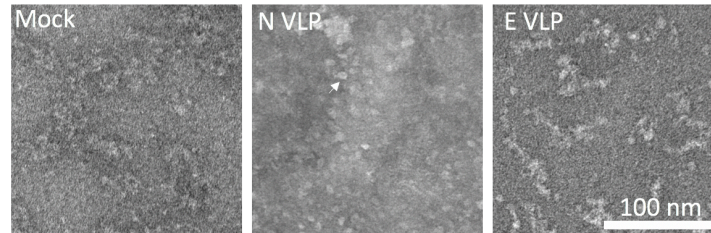

**Figure S4.** TEM analysis of VLP fractions. VLP collections were performed on mock, N, or E-transfected cells. Each VLP fraction was added to a glow discharged 400-mesh copper grid covered with carbon-coated collodion film. Grids were washed in one drop of water, stained in three drops of phosphotungstic acid (1.0% w/v), air dried, and imaged. Arrow in N VLP fraction represents large protein oligomers.

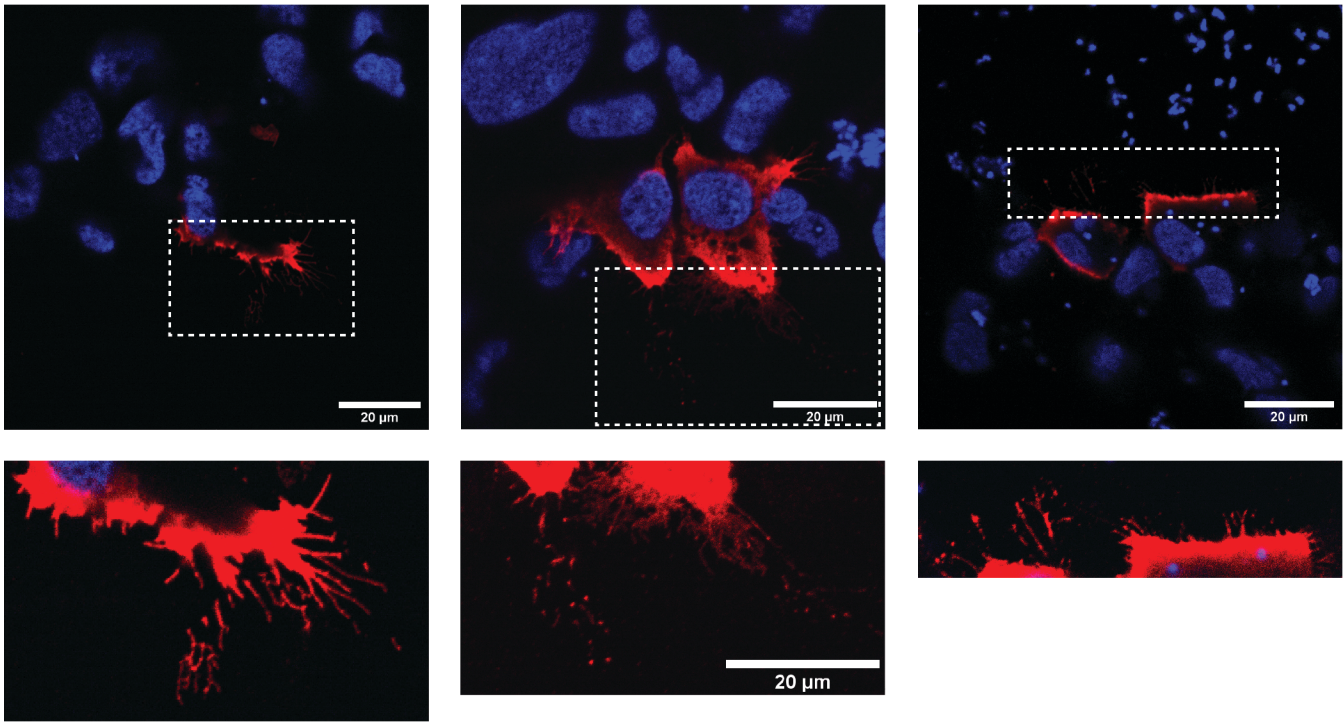

**Figure S5.** Immunofluorescence of SARS-COV-2 N in HEK293 cells. HEK293 cells expressing SARS-COV-2 N protein at 24-hours post-transfection were fixed, stained with nuclear stain (blue, Hoechst 3342) and subject to immunofluorescence assay with anti-SARS-COV-2 N antibody (1:500) followed by anti-rabbit IgG-Atto 594 (1:1000). SARS-COV-2 N protein localized in the filopodia along the cell surface.

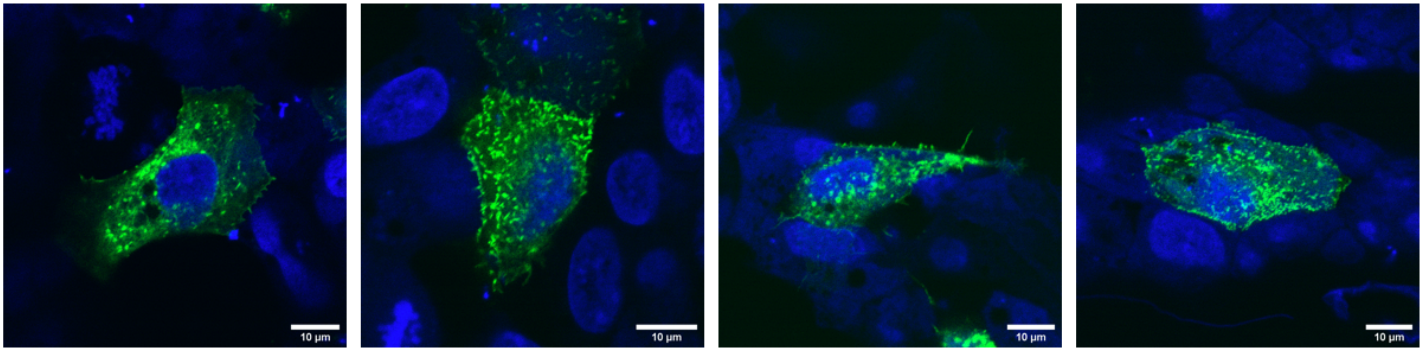

**Figure S6:** Expression of S-GFP in HEK293 cells. Fluorescence confocal images of SARS-CoV-2 S protein in HEK293 cells. HEK293 cells transiently expressing SARS-CoV-2 S protein at 24 hours post transfection were fixed, stained with nuclear stain (blue, Hoechst 3342) and imaged with confocal microscopy.

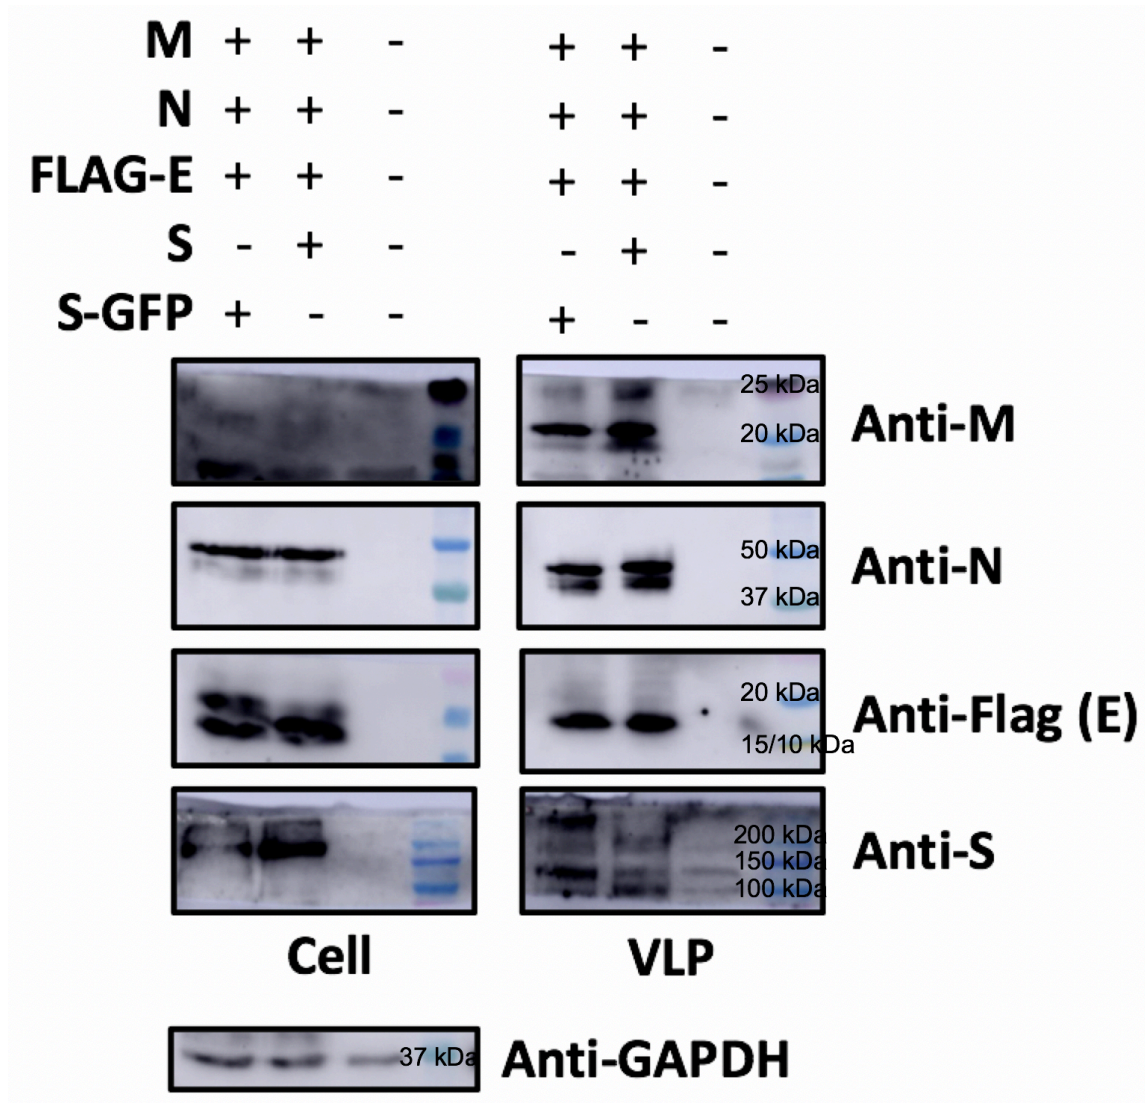

**Figure S7.** Western blot analysis of the cell lysate and VLP fractions of VLP and GFP-producing combinations of M, N, E, and S or S-GFP. Total protein content of cell lysates were used to normalize loading conditions and was quantified using the Pierce bicinchoninic acid assay. VLP loading was calculated as a constant ratio to normalized cell lysates.

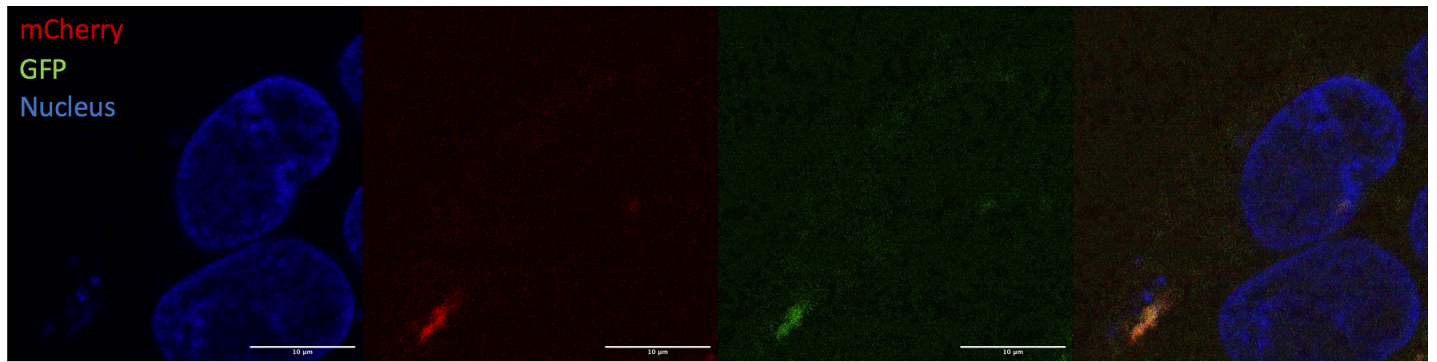

**Figure S8.** Infection of target HEK293 cells with media from S-GFP transfected cells. Media was removed from HEK293 cells expressing S-GFP 72-hours post-transfection and was used to infect target HEK293 cells. Target cells were spinoculated, incubated two hours, stained with nuclear stain (Hoechst 3342), and imaged with confocal microscopy.

| <u>Plasmid</u>   | <u>Construct</u> | <u>Tag</u> | <u>Construct Sequence / Reference</u>                                                                                                                                                                                                                                                                                                                                                                                                                                                                                                                                                                                                                                                                                                                                                                                                                                                                                                                                                                                                                                                                                                                                                                                                                                                                                                                       |
|------------------|------------------|------------|-------------------------------------------------------------------------------------------------------------------------------------------------------------------------------------------------------------------------------------------------------------------------------------------------------------------------------------------------------------------------------------------------------------------------------------------------------------------------------------------------------------------------------------------------------------------------------------------------------------------------------------------------------------------------------------------------------------------------------------------------------------------------------------------------------------------------------------------------------------------------------------------------------------------------------------------------------------------------------------------------------------------------------------------------------------------------------------------------------------------------------------------------------------------------------------------------------------------------------------------------------------------------------------------------------------------------------------------------------------|
| pcDNA3-M         | M                | No Tag     | ATGGCCGACAGCAACGGCACCATCACCGTGGAAGAGCTGAAGAACTGCTGGAACAGTGGAAACC<br>TGGTCATCGGCTTTCTGTTCTGACCTGGATCTGCCTGCTGCAGTTCGCTTATGCCAACCGGAACC<br>GGTTCCTGTACATCATCAAGCTGATCTTCTGTGGCTGCTGTGGCCTGTGACCTGGCTTGTTCCTGT<br>GCTGGCCCGCTTTACCGCATCACTGGATCACAGGCGGAATCGCTATCGCAATGGCCTGCCTGG<br>TGGGCTGTAGTGGCTGTCTACTTTCATCGCCAGCTTCCGGCTGTTTCCAGAAACCAGGAGCATGT<br>GGTCTTCAACCCGTAGACAACATCCTGCTGAACGTGCCCTCCACGGCACAATCCTGACAAAGAC<br>CACTGCTGGAGAGCGAGCTGGTATTGGCCCGGTATCCTTAGAGGCCACCTGAGAATCGCCGG<br>CCACCATCTGGGCAGATGCGATATCAAGGACCTGCCTAAGGAAATACCCGTGGCCACATCCAGAA<br>CCCTGAGCTACTACAACTGGGAGCCTCTCAAGAGTGGCCGGCGATAGCGGCTTCCGGCTTAC<br>AGCAGATACCGGATTGGAATTAAGCTGAATACCGACCACTAGCTCTAGCGACAACATCGCC<br>CTGCTGGTGCACTGA                                                                                                                                                                                                                                                                                                                                                                                                                                                                                                                                                                                                                                        |
| pcDNA3-HA-M      | HA-M             | HA         | TACCATACGATGTTCCAGATTACGCTGGTACCGGCGGAAGCGCCGACAGCAACGGCACCATCAC<br>CGTGGAAGAGCTGAAGAACTGCTGGAACAGTGGAACTGGTCACTCGGCTTTCTGTTCCTGACCT<br>GGATCTGCCTGCTGCAGTTCGCTTATGCCAACCGGAACCGGTTCTGTACATCATCAAGCTGATCT<br>TCCTGTGGCTGCTGTGGCCTGTGACCCTGGCTTGTTCGTGCTGGCCGCGTTTACCGCATCAACT<br>GGATCACAGGCGGAATCGCTATCGCAATGGCCTGCCTGGTGGCCTGATGTGGCTGTCTACTTC<br>ATCGCCAGCTTCCGGCTGTTTCCAGAACCCAGGAGCATGTGGTCTTCAACCCGTAGACAACATC<br>CTGCTGAACGTGCCCTCCAGGCACAATCTGACAAAGACCACTGCTGGAGAGCGAGCTGGTGTAT<br>TGGCGCGTGTATCCTTAGAGGCCACCTGAGAATCGCCGGCCACCATCTGGGCAGATGCGATATCA<br>AGGACCTGCCTAAGGAAATCACCGTGGCCACATCCAGAACCCGTGAGCTACTACAACTGGGAGCC<br>TCTCAAAGAGTGGCCGGCGATAGCGGCTTCCGGCTTACAGCAGATACCGGATTGGAATTAACA<br>GCTGAATACCGACCACTAGCTCTAGCGACAACATCGCCCTGCTGGTGCACTGA                                                                                                                                                                                                                                                                                                                                                                                                                                                                                                                                                                                              |
| pcDNA3-N         | N                | No Tag     | ATGTCTGACAACGGCCCTCAGAACCAGCGGAATGCCCAAGAACTCACCTTCCGGCGCCCTCCGA<br>TTCTACAGGCTCCAACCAAGAAATGGAGAGAGGTCCGGAGCACGCTCAAGCAGCGGAGACCACAG<br>GGCCTGCCAACAAATACCGCCAGCTGGTTACCGCCCTGACACAGCACGGCAAGGAGGACCTGA<br>AGTTTTCCAGGGGCGAGGGCGTGCCTATCAACACCAATAGCTCCCTGACGATCAGATCGGCTAC<br>TATAGGAGGGCAACAAGGAGAATCCGGGAGGGCGACGGCAAGATGATGCTGTCCTCCCGCAGA<br>TGGTACTTCTACTATCTGGGCACCGGACCTGAGGCAGGACTGCCATATGGCGCAATAAGGACGG<br>AATCATCTGGTGGCAACCGAGGGCGCCCTGAACACACAAAGGATCAGATCGGCACACGCAAT<br>CCCGCAACAATGCAGCAATCGTGTCCAGCTGCCACAGGGCACCACACTGCCAAGGGCTTTTA<br>CGCAGAGGGCAGCAGGGGCGGCTCCAGGCCTCTAGCCGCTCCTTAGCCGGTCCAGAAAATCC<br>TCTCGGAATTCTACCCAGGAGCTCCCGGGGCACAAGCCCTGCAAGAATGGCAGGAAACGGAG<br>GGCAGCGCCGCTGGCCCTGCTGCTGCTGGATAGACTGAATCAGCTGGAGTCTAAGATGAGCGG<br>CAAGGGACAGCAGCAGCGGACAGACCGGTGACAAAGAGTCTGCCCGGAGGCCAGCAAGAA<br>GCCAAGGCAGAAAGCGCACCGCCACAAGGCCACAACTGACCCAGGCTTCCGGCAGGCGCGG<br>ACCAGAGCAGACACAGGGCAATTTGGCGACCAGGAGCTGATCAGGCAGGGCACCAGATTATAAG<br>CACTGGCCTCAGATCGCACAGTTCGCACCAAGCGCCTCCGCCTTCTTTGGCATGAGCAGGATCGG<br>AATGGAGGTGACCCCATCCGGCACATGGCTGACCTACACAGGCAGCATCAAGCTGGAGCATAAG<br>GACCCCTAATTCAAGGATCAGGTATCCTGCTGAACAAGCAGATCGATGCCTATAAGACCTTCCC<br>CCTACAGAGCCCAAGGAGGACAAGAAAGAGGCGGATGAGACCCAGGCCCTCCCTCAGAGA<br>CAGAAGAAGCAGCAGACCGGTGACACTGCTGCCAGCCCGCACCTGGACGATTTTCCAAGCAGCT<br>CCAGCAGTCTATGTCTAGCGCGATAGCACCAGTGA |
| pCMV-3xFlag-E    | 3xFlag-E         | 3xFlag     | ATGGATTACAAGGATGACGACGATAAGGACTATAAGGACGATGATGACAAGGACTACAAGATGA<br>TGACGATAAAGCCCGGGCGGGATCCCCGGGCTGCAGGAATTCGATATCAAGCTTTACTCTTTTGT<br>GAGCGAGGAGACCGGCACACTGATCGTGAACCTCGTGTCTGCTGTTCCGCGCTTTGGTGTTC<br>TGCTGGTACCCTGGCAATCCTGACAGCCCTGAGGCTGTGCGCCTATTGCTGTAACATCGTGAAC<br>GTGAGCCTGGTGAAGCCCTCTTCTACGTGTATAGCCGGGTGAAGAACCTGAATAGCTCCAGAGT<br>GCCTGACCTGCTGGTGTGA                                                                                                                                                                                                                                                                                                                                                                                                                                                                                                                                                                                                                                                                                                                                                                                                                                                                                                                                                                                      |
| pCAGGS-S         | S                | No Tag     | BEI Resources NR-52310                                                                                                                                                                                                                                                                                                                                                                                                                                                                                                                                                                                                                                                                                                                                                                                                                                                                                                                                                                                                                                                                                                                                                                                                                                                                                                                                      |
| pcDNA3.1-S-GFP   | S-GFP            | GFP        | Genescript MC_0101089                                                                                                                                                                                                                                                                                                                                                                                                                                                                                                                                                                                                                                                                                                                                                                                                                                                                                                                                                                                                                                                                                                                                                                                                                                                                                                                                       |
| pcDNA3.1-S-APEX2 | S-APEX2          | APEX2      | S-GFP construct with GFP replaced with APEX2                                                                                                                                                                                                                                                                                                                                                                                                                                                                                                                                                                                                                                                                                                                                                                                                                                                                                                                                                                                                                                                                                                                                                                                                                                                                                                                |

**Figure S9.** Table of construct sequences used for mammalian expression of SARS-CoV-2 structural proteins.
